# Supplementary material for: Cyclic Game Dynamics Driven by Iterated Reasoning
Source: PubMed Central journal article supplement (PMC3575333; doi:10.1371/journal.pone.0056416), 2013-02-18

Figure S2

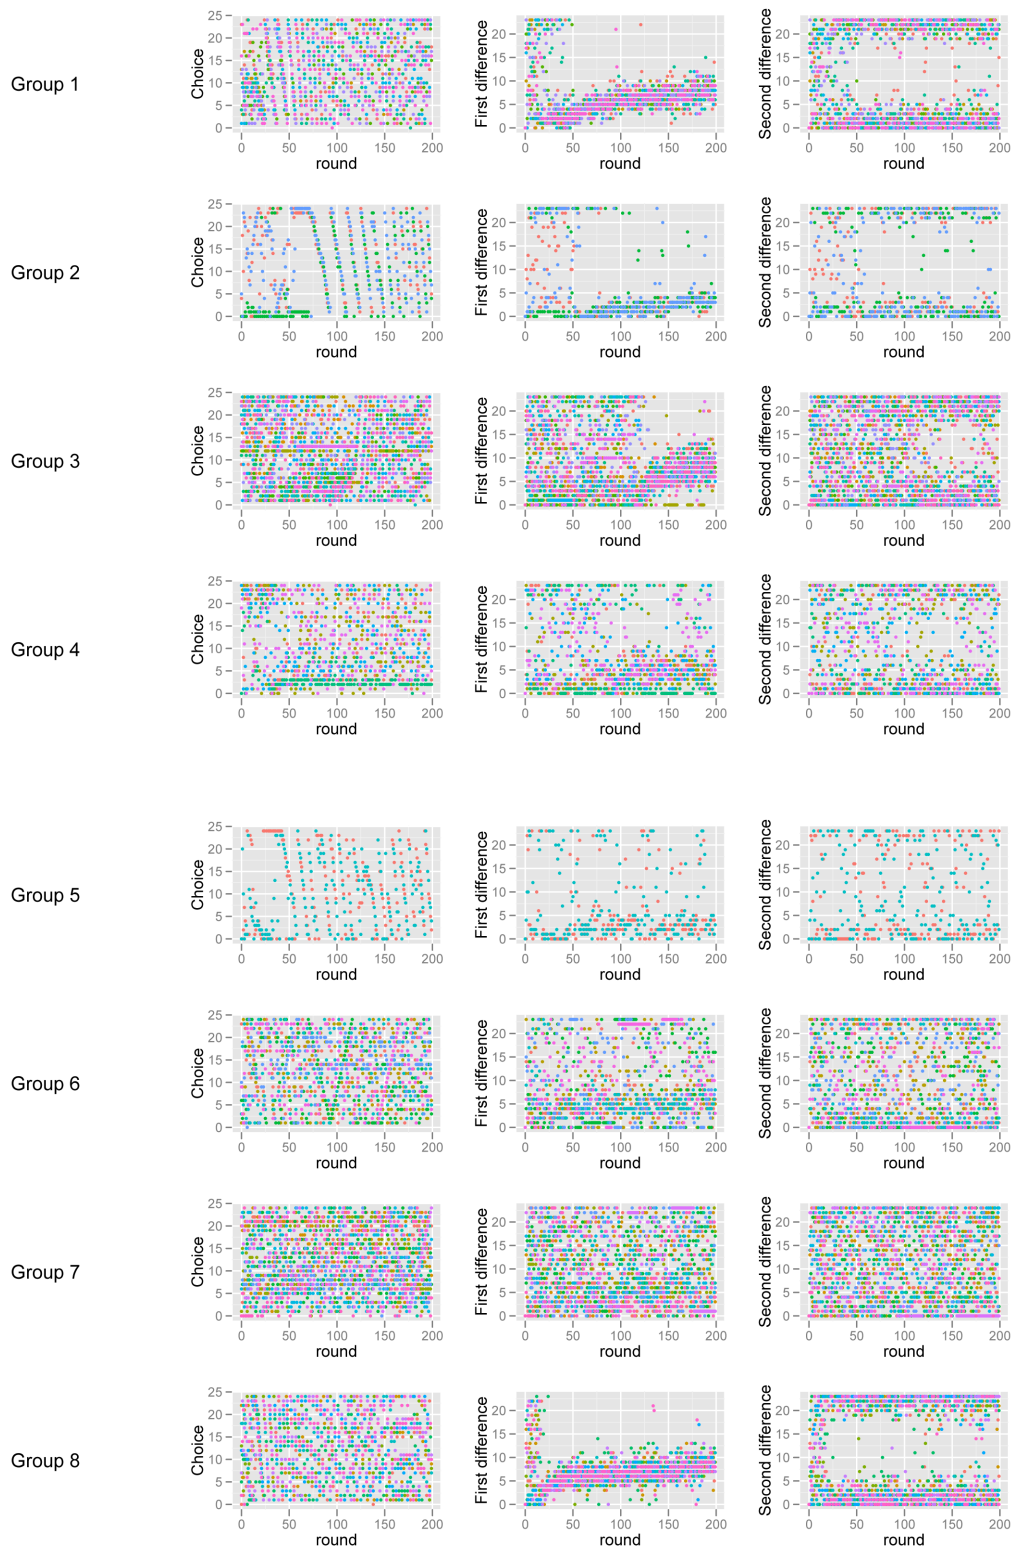

Group 9

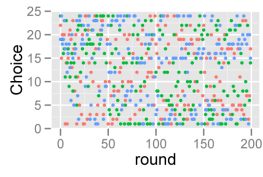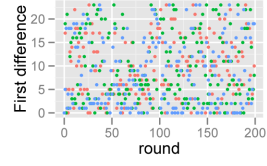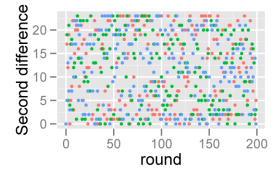

Group 10

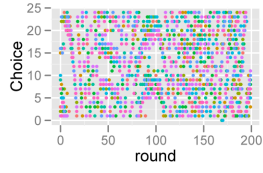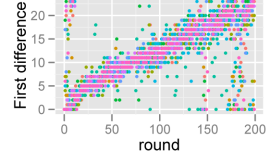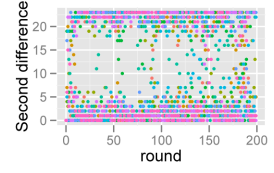

Group 11

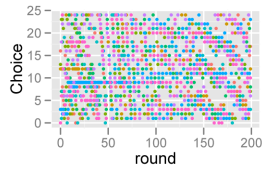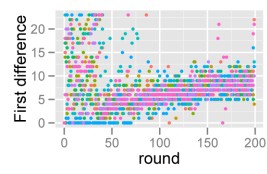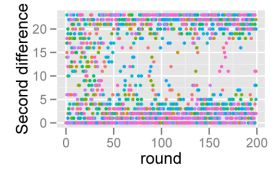

Group 12

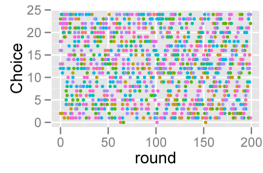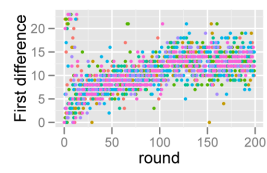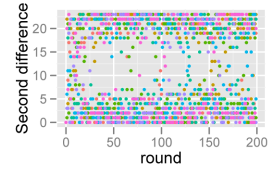

Group 13

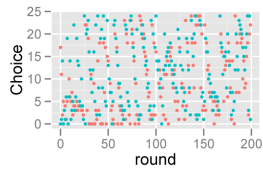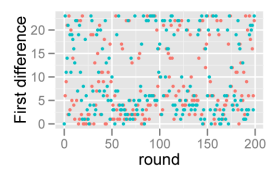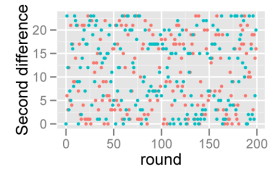

Group 14

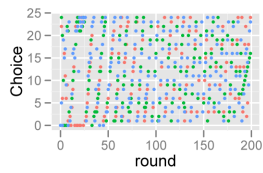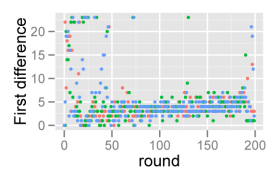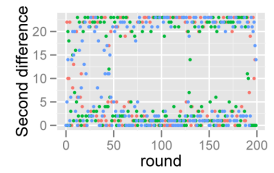

Group 15

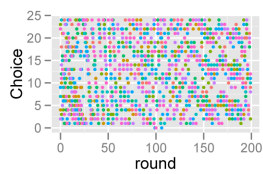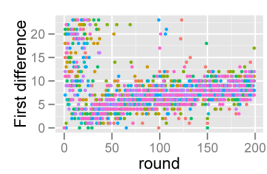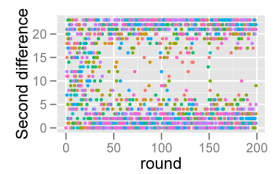

Group 16

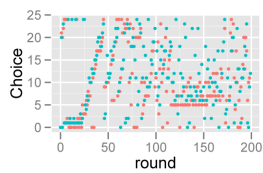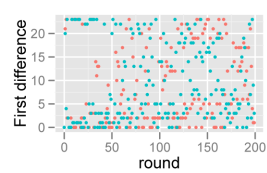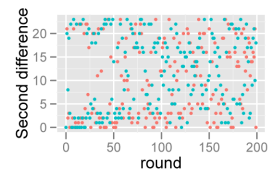

Group 17

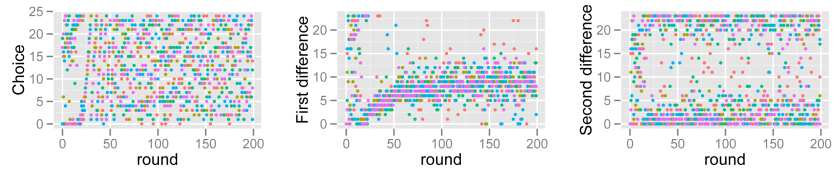

Group 18

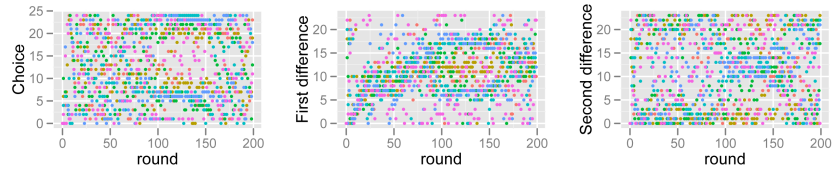

Group 19

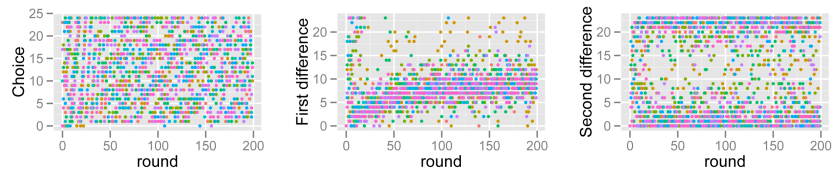

Group 20

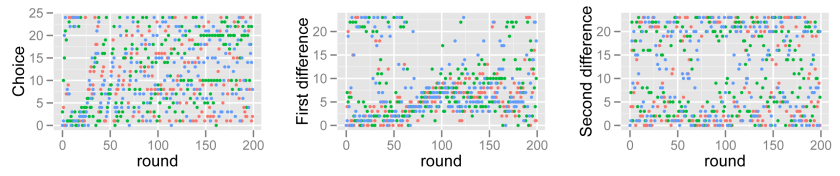

Group 21

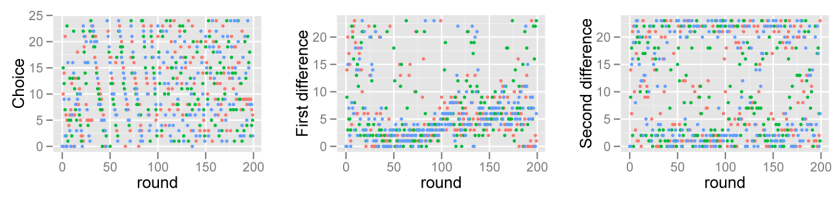

Group 22

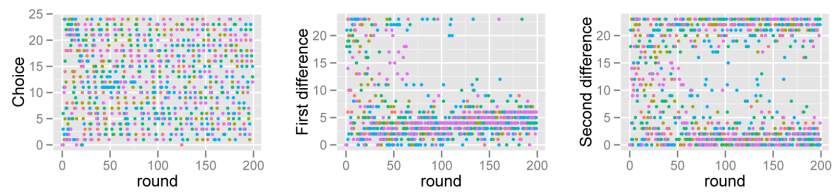

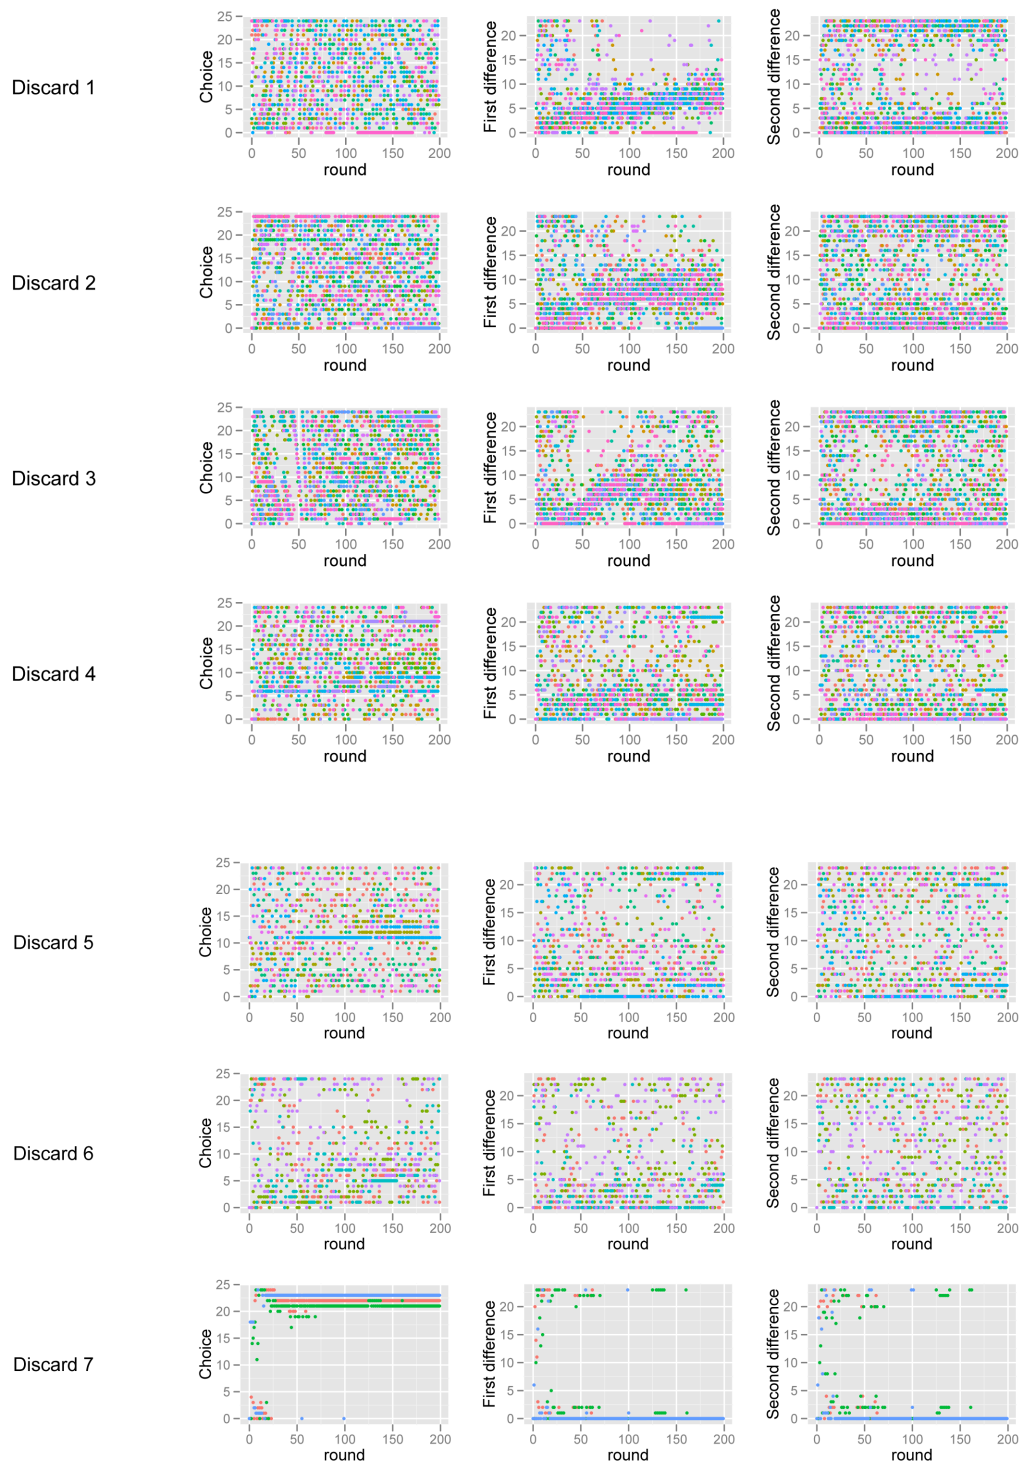

Supplement: pone.0056416.s001.pdf [file pone.0056416.s001.pdf]
